# Supplementary figures and images for: Phenazine-1,6-diol selectively inhibited non-small cell lung cancer via DR5-mediated apoptosis
Source: Research Square preprint supplement (doi:10.21203/rs.3.rs-8162519/v1), 2025-11-21

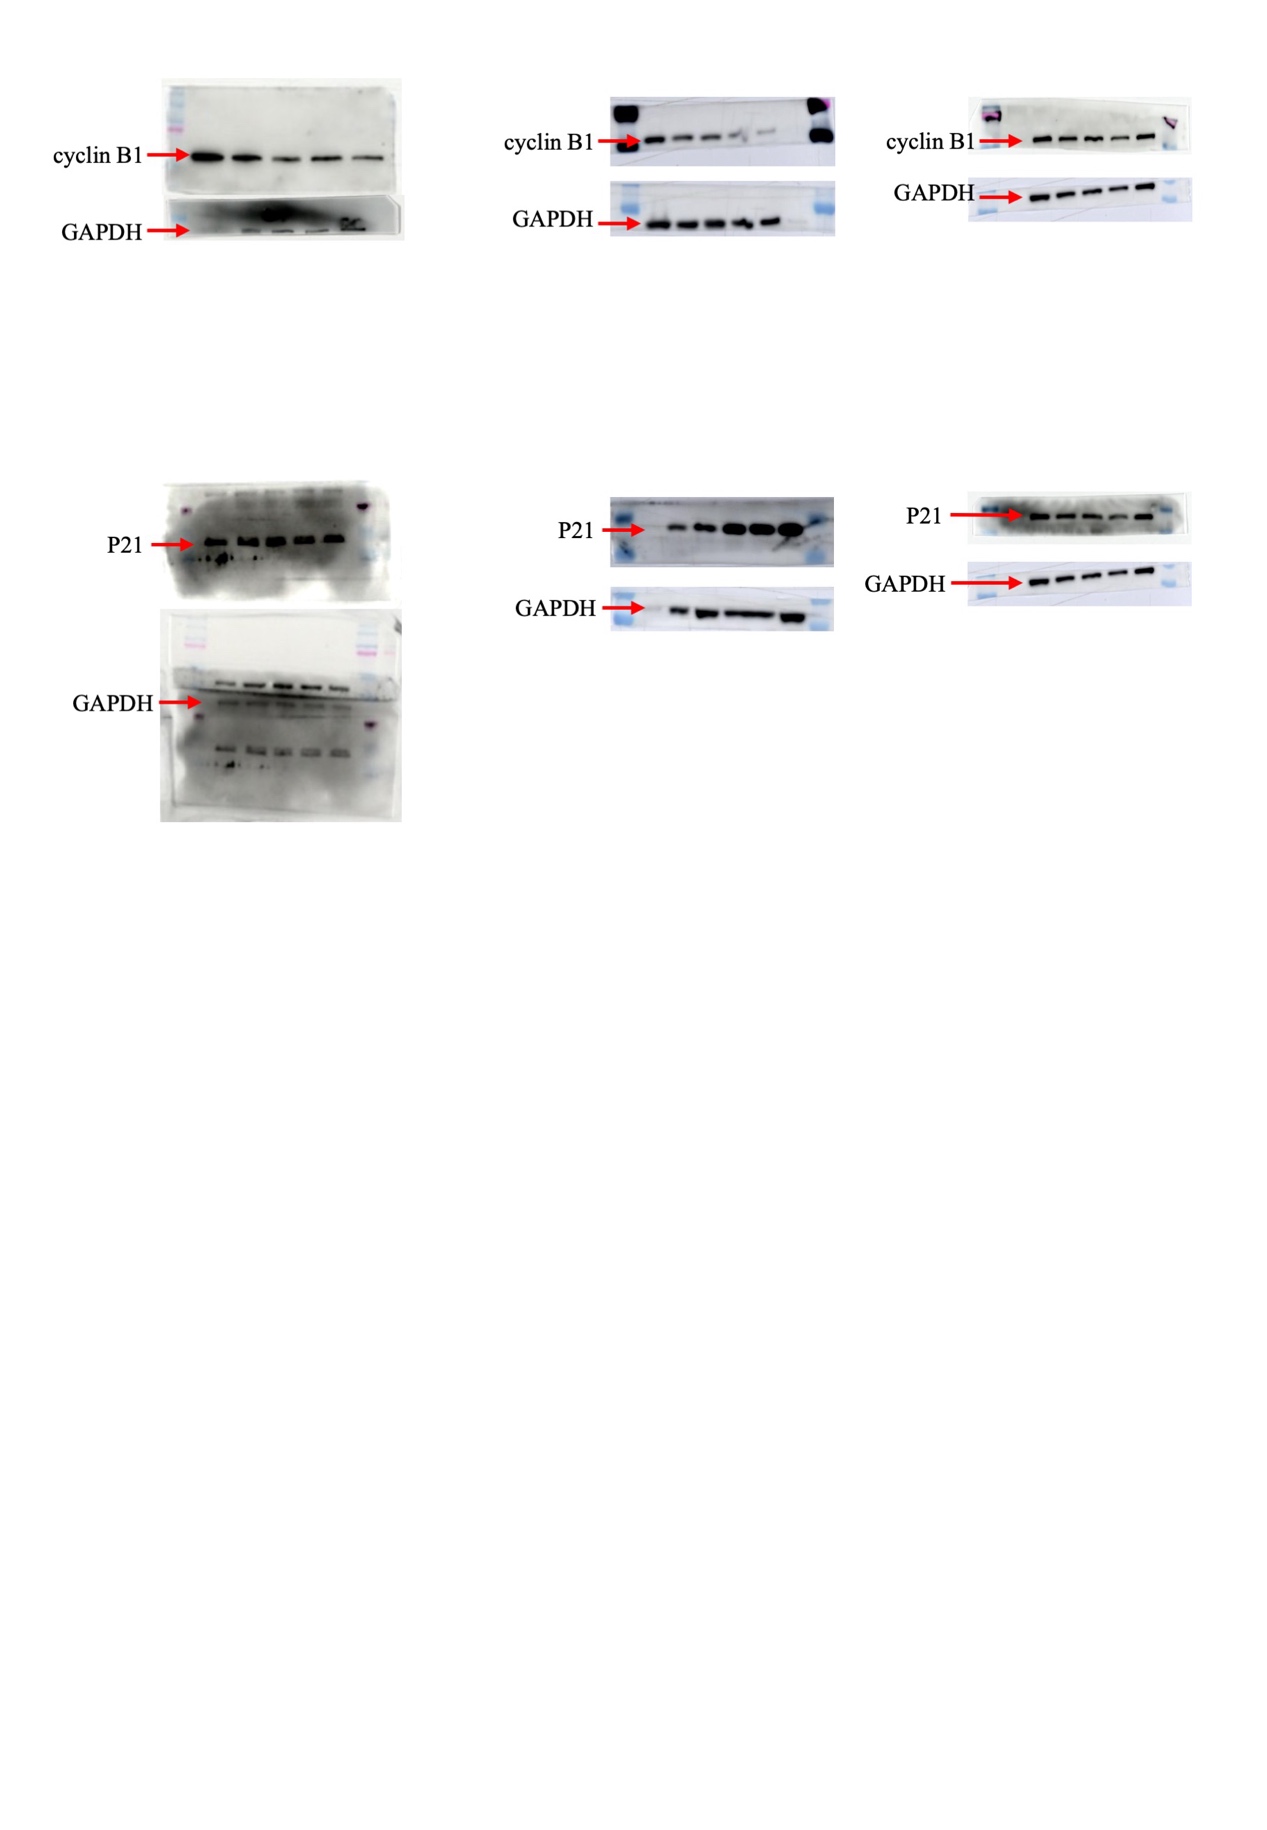


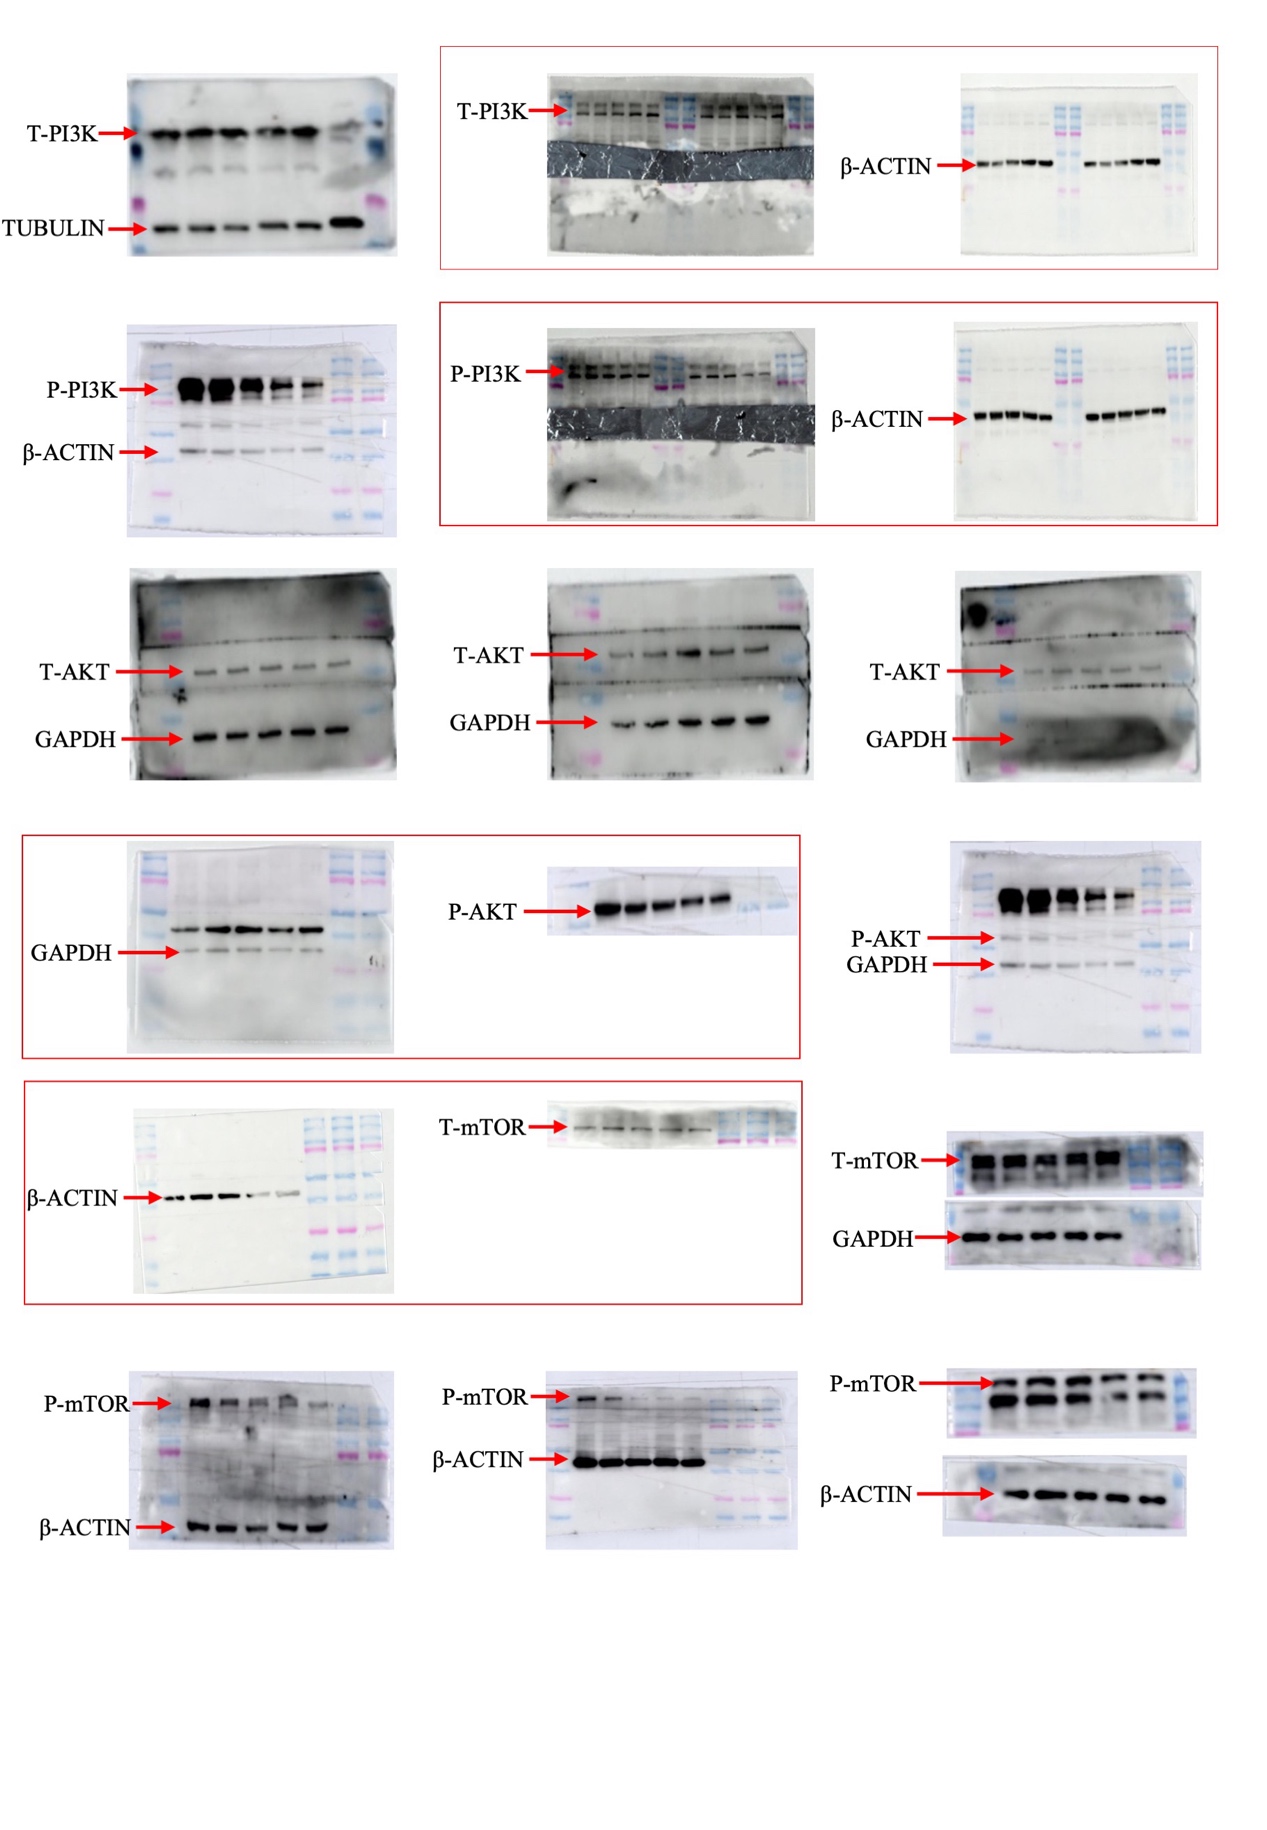


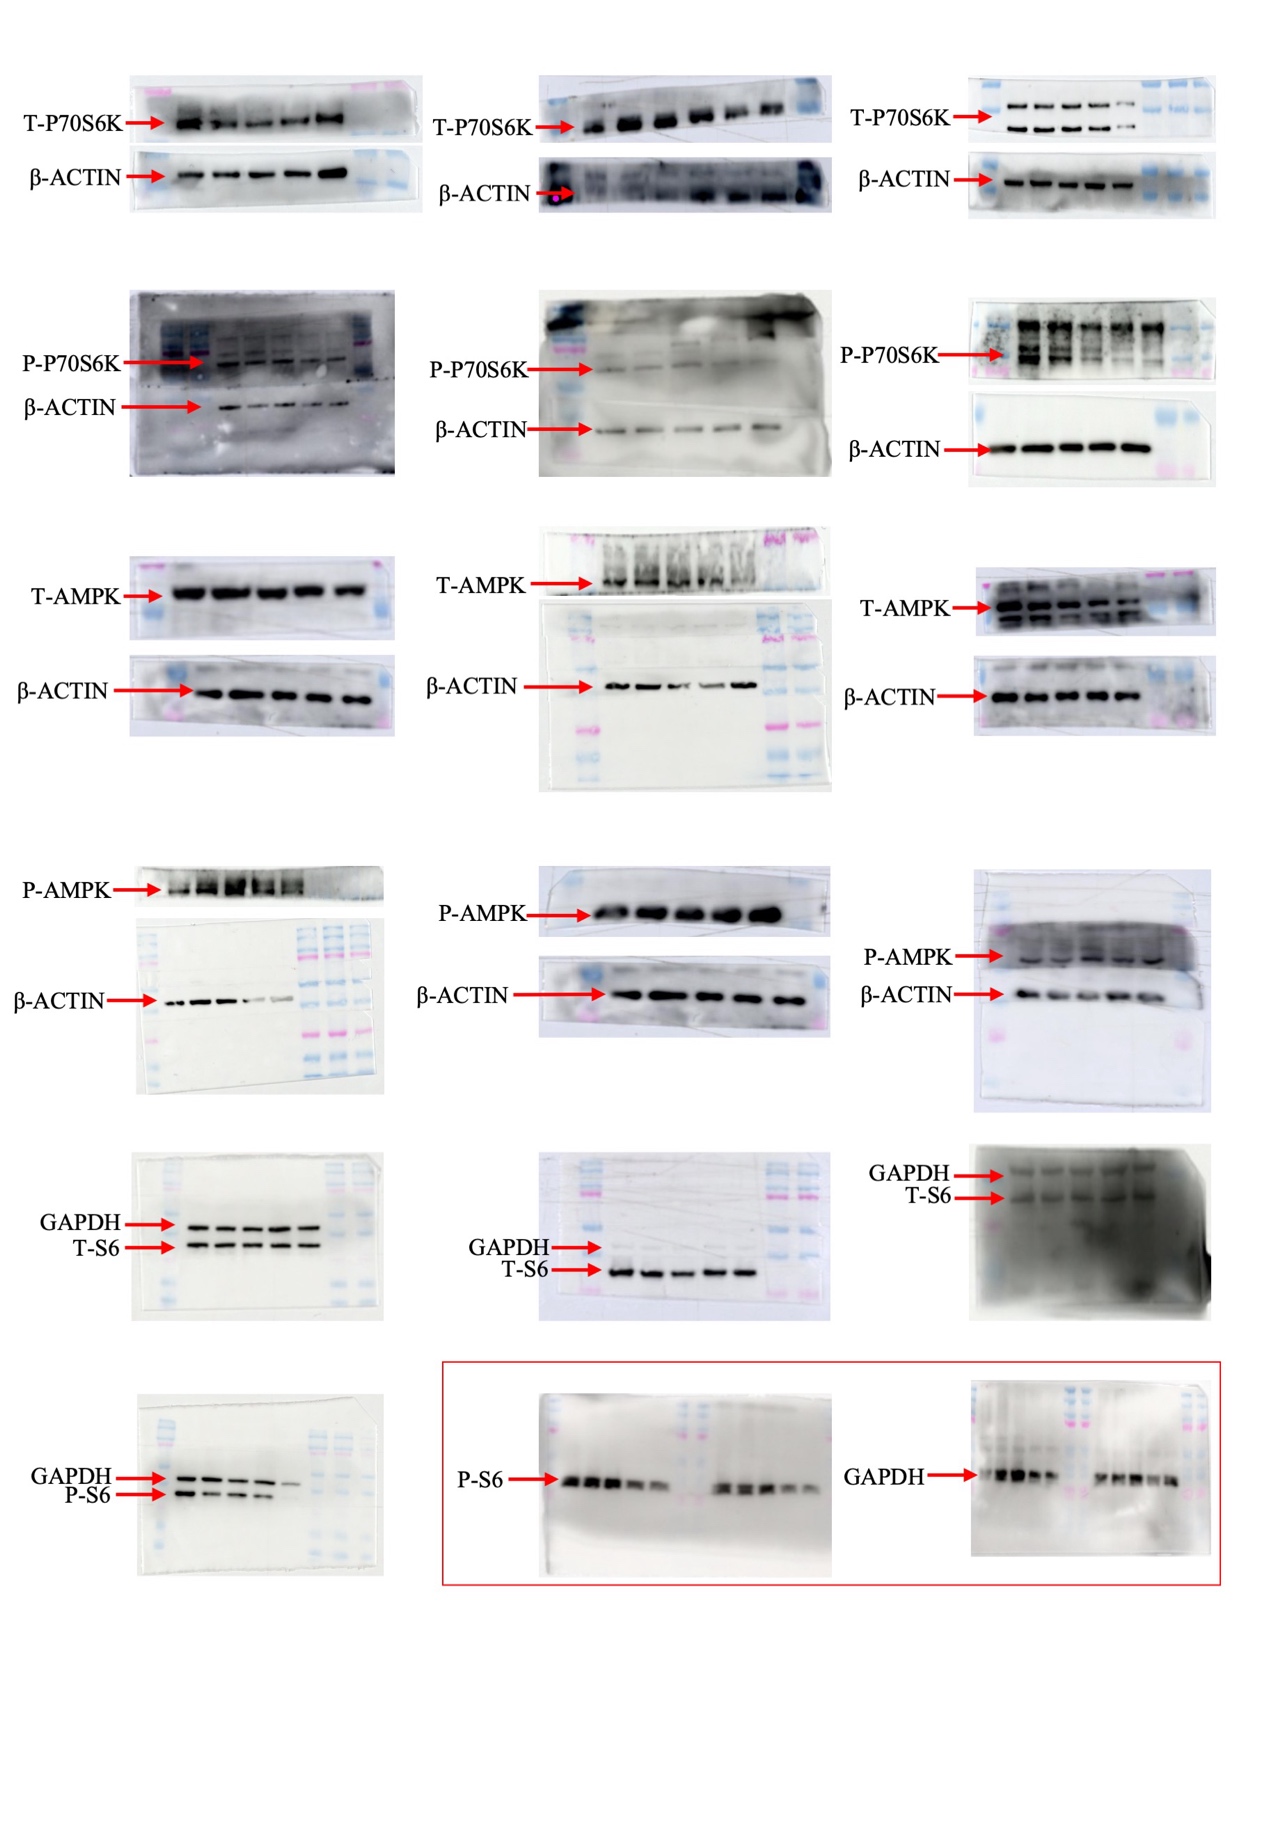


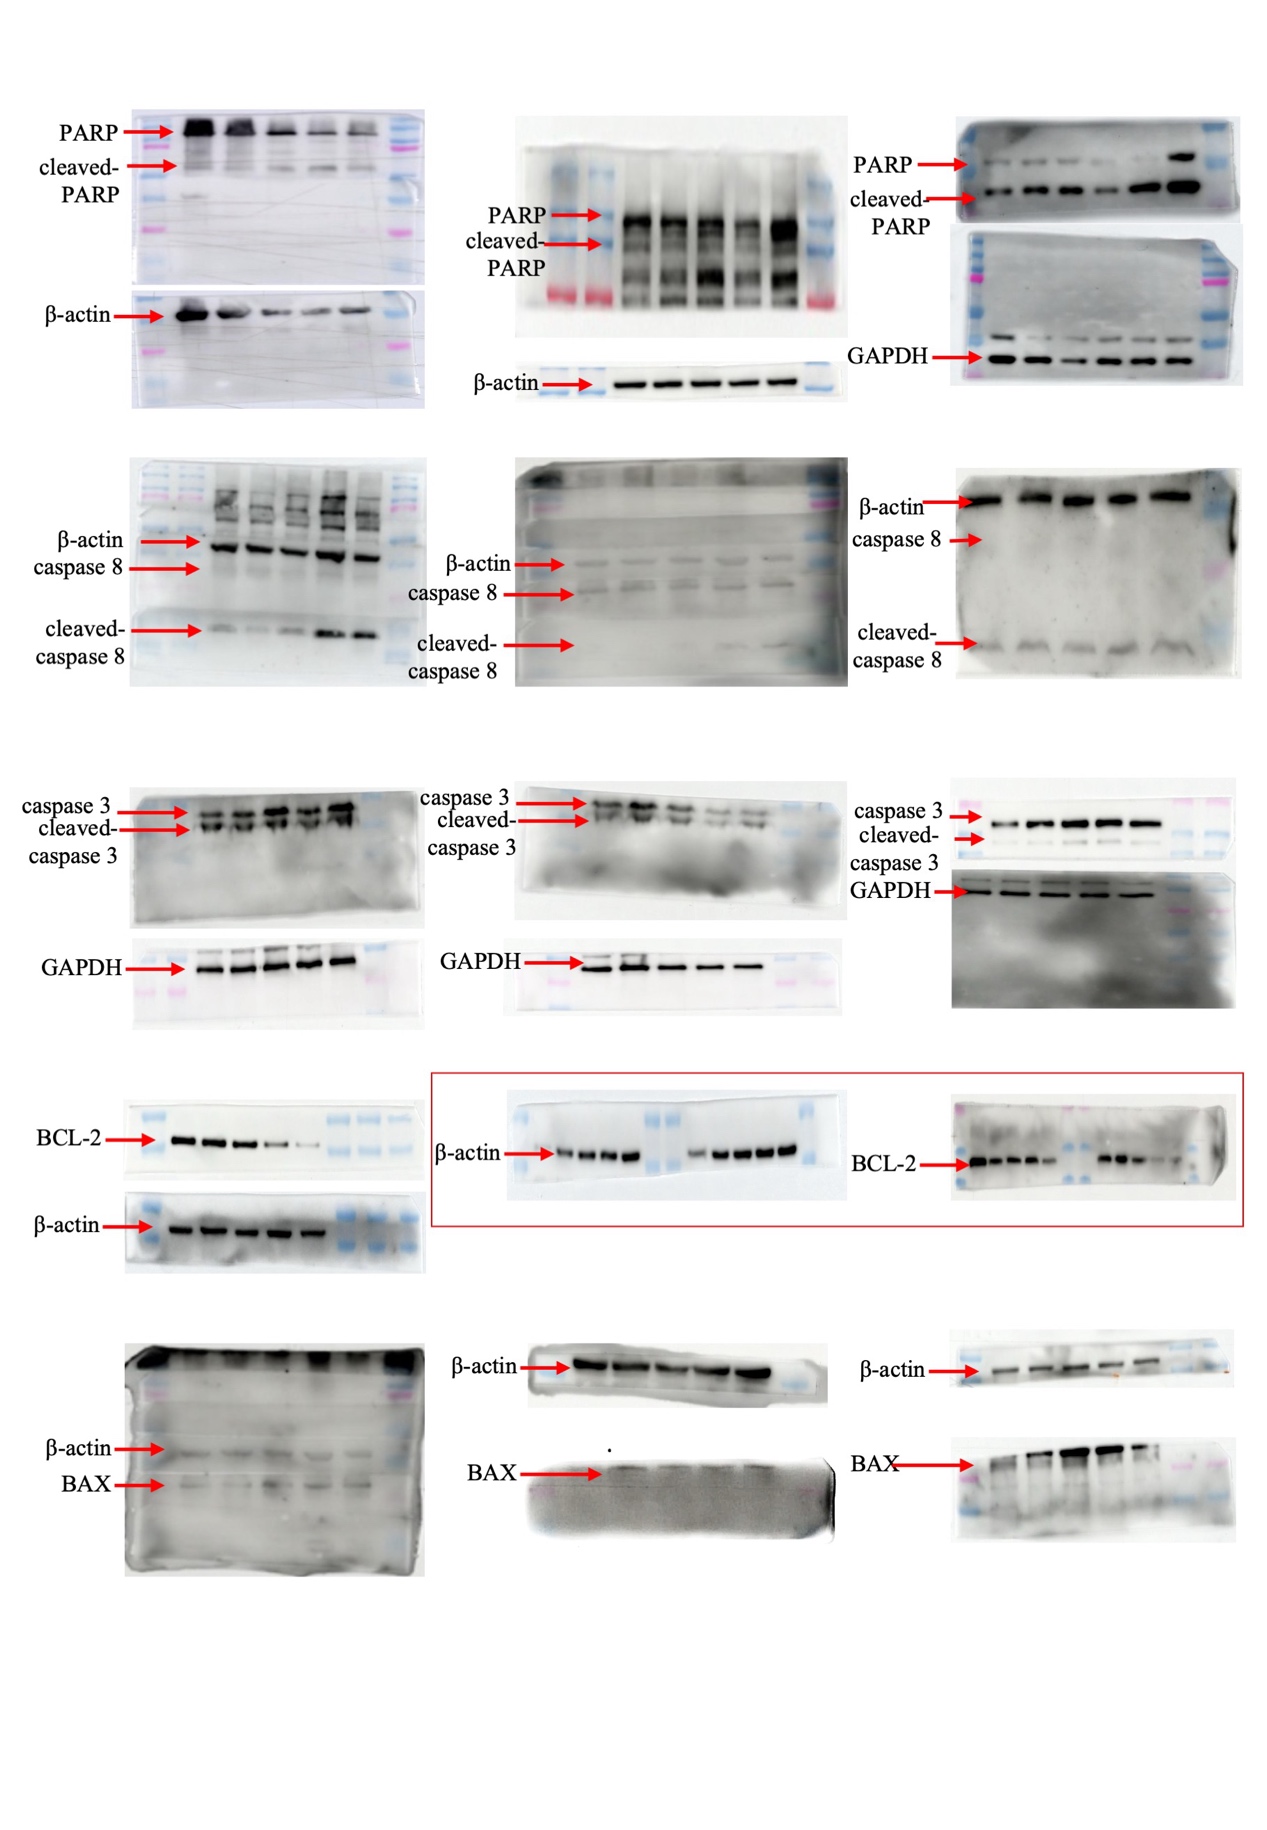


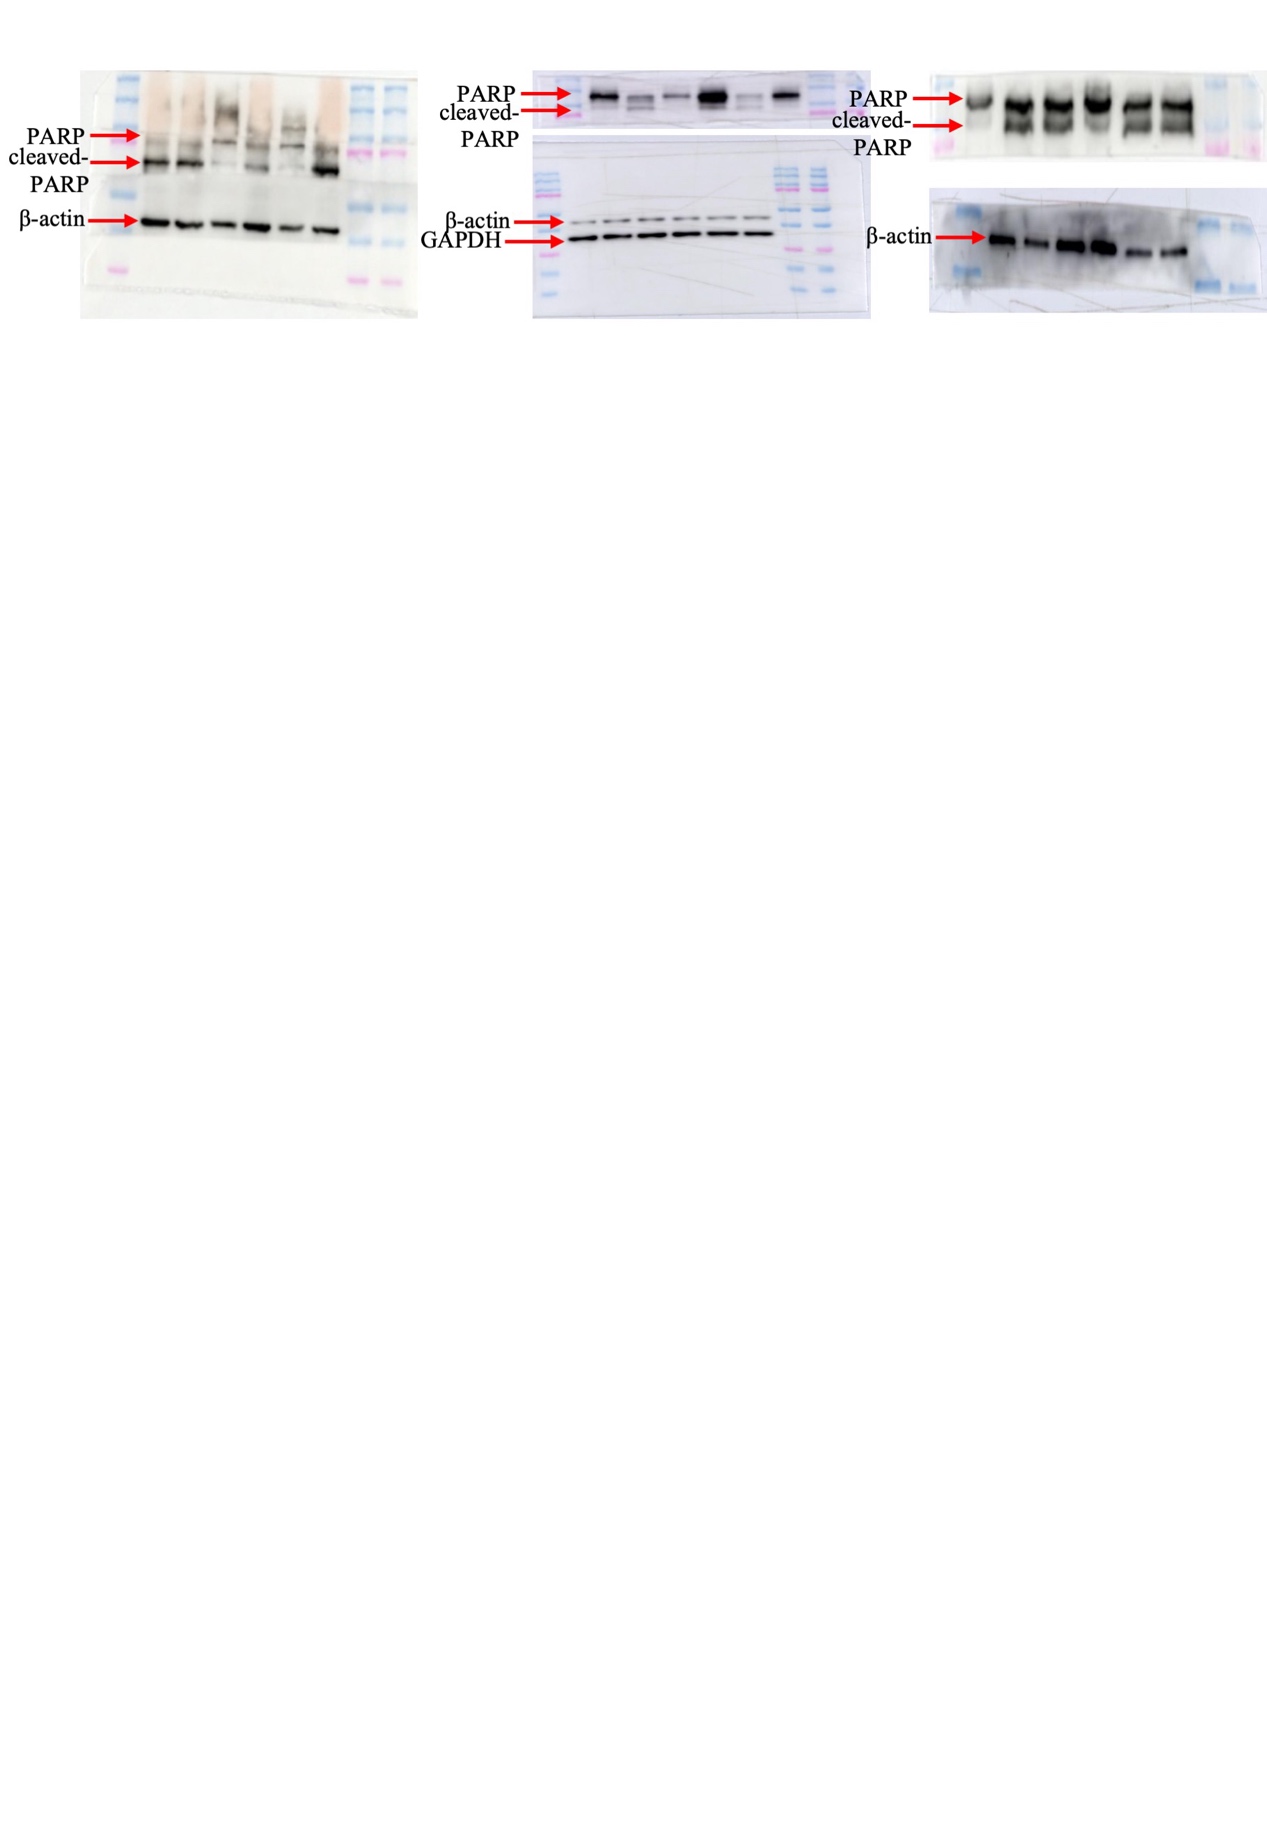


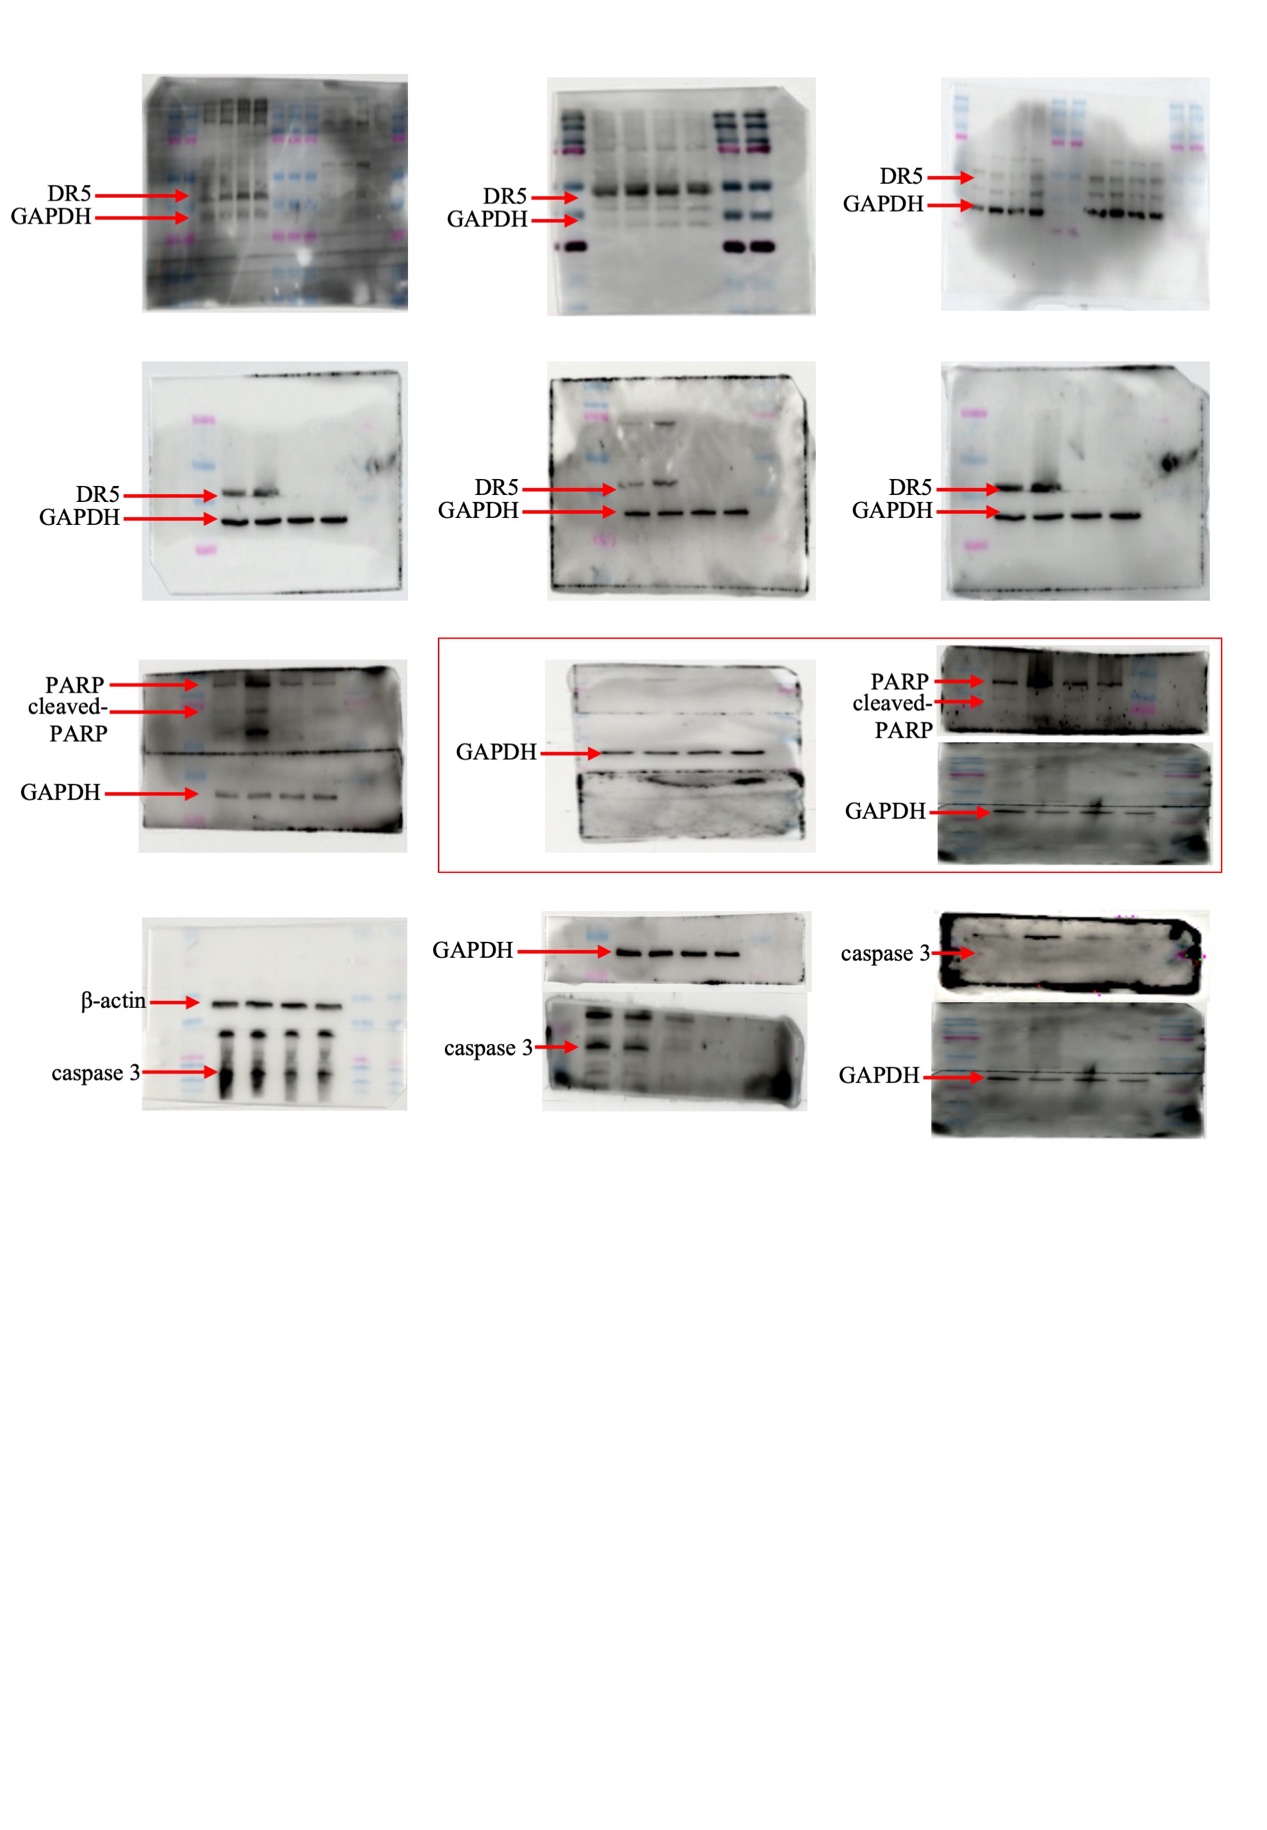

Supplement: Supplementary file 2 [file a7c726538dec5c4226eecfce.docx]
